# Supplementary material for: Concentrations of Salivary Cortisol in Victims of Intimate Partner Violence According to the CIRCORT Database
Source: MDPI journal article supplement (doi:10.3390/ijerph182010819), 2021-10-14
Supplement: s1 [file s1]

**Table S1.** Statistical descriptive summary of the different cortisol concentrations obtained in the samples collected from the two sample populations under study. Data expressed nmol/l.

|            | Non-victims of IPV women (N = 25) |        |         |       |         |       | Women victims of IPV (N = 24) |       |         |       |         |       |
|------------|-----------------------------------|--------|---------|-------|---------|-------|-------------------------------|-------|---------|-------|---------|-------|
|            | 1st day                           |        | 2nd day |       | 3rd day |       | 1st day                       |       | 2nd day |       | 3rd day |       |
|            | M                                 | SD     | M       | SD    | M       | SD    | M                             | SD    | M       | SD    | M       | SD    |
| CAR (AUCi) | 2.136                             | 3.660  | 2.192   | 3.460 | 1.252   | 4.280 | 3.156                         | 5.760 | 2.481   | 4.300 | 2.665   | 3.500 |
| Sample 1   | 11.788                            | 6.733  | 9.983   | 4.833 | 11.567  | 6.040 | 12.852                        | 6.579 | 12.852  | 6.706 | 12.600  | 6.381 |
| Sample 2   | 18.100                            | 11.896 | 14.946  | 9.245 | 16.896  | 6.279 | 17.124                        | 8.053 | 17.236  | 8.073 | 15.078  | 8.195 |
| Sample 3   | 4.325                             | 2.374  | 4.558   | 2.240 | 4.467   | 3.142 | 5.796                         | 7.772 | 5.508   | 4.204 | 4.961   | 2.844 |

Note. M: mean; SD: standard deviation; AUCi: area under the curve with respect to increase.

**Table S2.** Summary table of the ANOVA applied to the CAR data obtained.

| Source                                                    | SS       | df  | MS     | F     | p     |
|-----------------------------------------------------------|----------|-----|--------|-------|-------|
| Variables: Non-victims of IPV women- Women victims of IPV | 30.240   | 1   | 30.240 | 1.690 | 0.196 |
| Repetitions: Days                                         | 11.790   | 2   | 5.900  | 0.330 | 0.720 |
| Variables x Repetitions                                   | 7.960    | 2   | 3.980  | 0.220 | 0.803 |
| Error                                                     | 2516.640 | 141 | 17.850 |       |       |
| TOTAL                                                     | 2566.630 | 146 |        |       |       |

Note. SS: Sum of Squares; df: Degrees of freedom; MS: Mean Squares; F: F de Snedecor; p: p-value.

**Table S3.** The number of women with saliva cortisol levels within or outside the maximum percentiles as compared to the CIRCORT database, according to the sample collection and day.

|                  | Non-victims of IPV women (N = 25) |     | Women victims of IPV (N = 24) |     | $p^{\dagger}$ |
|------------------|-----------------------------------|-----|-------------------------------|-----|---------------|
|                  | in                                | out | in                            | out |               |
| Sample 1 1st day | 23                                | 2   | 22                            | 2   | 1.000         |
| Sample 1 2nd day | 25                                | 0   | 21                            | 3   | 0.110         |
| Sample 1 3rd day | 23                                | 2   | 23                            | 1   | 1.000         |
| Sample 2 1st day | 21                                | 4   | 19                            | 5   | 0.725         |
| Sample 2 2nd day | 23                                | 2   | 18                            | 6   | 0.138         |
| Sample 2 3rd day | 23                                | 2   | 22                            | 2   | 1.000         |
| Sample 3 1st day | 19                                | 6   | 8                             | 16  | 0.004 **      |
| Sample 3 2nd day | 15                                | 10  | 3                             | 21  | 0.001 ***     |
| Sample 3 3rd day | 19                                | 6   | 4                             | 20  | 0.000 ***     |

Note. In: number of women with saliva cortisol levels within the maximum percentiles; Out: number of women with saliva cortisol levels outside the maximum percentiles; †: Fisher's exact test. Significant for  $\alpha = 0.01$  \*  $p < 0.05$  \*\*  $p < 0.01$  \*\*\*  $p < 0.001$
